# Supplementary material
Source: PubMed Central journal article supplement (PMC3570703)
Supplement: NIHMS430304-supplement-221_2012_3354_MOESM2_ESM.pdf [file NIHMS430304-supplement-221_2012_3354_MOESM2_ESM.pdf]

# Signal detection theory and vestibular perception: III. Estimating unbiased fit parameters for psychometric functions

## Experimental Brain Research

Shomesh E. Chaudhuri, Daniel M. Merfeld

S. E. Chaudhuri, D. M. Merfeld  
Jenks Vestibular Physiology Laboratory,  
Massachusetts Eye and Ear Infirmary,  
Boston, MA, USA  
e-mail: shomesh\_chaudhuri@meei.harvard.edu

D. M. Merfeld (corresponding author)  
Otology and Laryngology,  
Harvard Medical School,  
Boston, MA, USA  
e-mail: dan\_merfeld@meei.harvard.edu  
Telephone: (617) 573-5595  
Fax: (617) 573-5596

### Online Resource 2

Since the biased-reduced  $\hat{\sigma}$  estimates in Table 2 of the paper are positively biased, we can use a scale factor ( $\alpha$ ) to improve both the accuracy (reduced bias) and precision (lower variance) of our estimates. If  $\mu$  is set to  $k\sigma$ , where  $k$  is a constant, the expected BRGLM  $\hat{\sigma}$  bias ( $E[\hat{\sigma}] - \sigma$ ) scales linearly with  $\sigma$ , but the size of the scaling increases non-linearly with increasing values of  $|k|$ . Fig. S2 shows the expected BRGLM  $\hat{\sigma}$  bias normalized by  $\sigma$ ,  $(E[\hat{\sigma}] - \sigma)/\sigma$ , for a 3D/1U staircase with  $n = 25$  as a function of  $|k|$ , where  $\mu = k\sigma$ . We can fit the simulated expected percent bias to a 4<sup>th</sup> order polynomial such that:

$$(E[\hat{\sigma}] - \sigma)/\sigma = -0.030|k|^4 + 0.062|k|^3 + 0.254|k|^2 - 0.038|k| + 0.085$$

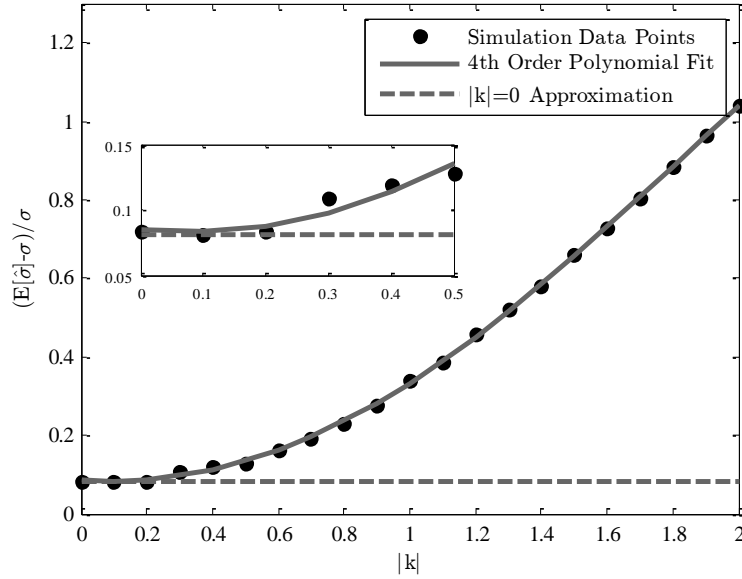

**Fig. S2** The expected BRGLM  $\hat{\sigma}$  percent bias for a 3D/1U staircase with  $n = 25$  as a function of  $|k|$ , where  $\mu = k\sigma$

We note that for small  $k$ , which, in our experience, includes the majority of normal vestibular data, the expected percent bias is nearly constant and so using the value (0.085) at  $|k| = 0$  in this range provides a good approximation. In this case  $\alpha$  is constant and is equal to  $(1 + ((E[\hat{\sigma}] - \sigma)/\sigma)|_{k=0})^{-1} = (1.085)^{-1} = 0.922$ . If the range of  $|k|$  were greater we could use the 4<sup>th</sup> order polynomial fit to calculate  $\alpha$ . From the BRGLM fit we would get an estimate of  $\hat{k}$  equal to  $\hat{\mu}/\hat{\sigma}$ . Using the 4<sup>th</sup> order polynomial, we could then estimate the expected percent bias and  $\alpha$  would be equal to  $(1 + ((E[\hat{\sigma}] - \sigma)/\sigma)|_{\hat{k}})^{-1}$ .
